# Supplementary material for: Hierarchical assembly of Ti(iv)/Sn(ii) co-doped SnO2 nanosheets along sacrificial titanate nanowires: synthesis, characterization and electrochemical properties
Source: Royal Society of Chemistry journal article supplement (doi:10.1039/c3nr02456c), 2013-01-01
Supplement: c3nr02456c.pdf [file c3nr02456c.pdf]

## Supporting Information

### Hierarchical Assembly of Ti(IV)/Sn(II) co-doped SnO<sub>2</sub> Nanosheets along Sacrificial Titanate Nanowires: Synthesis, Characterization and Electrochemical Properties

Hongkang Wang,<sup>a</sup> Liujiang Xi,<sup>b</sup> Jiri Tucek,<sup>c</sup> Yawen Zhan,<sup>a</sup> Tak Fu Hung,<sup>b</sup> Stephen V. Kershaw,<sup>a</sup> Radek Zboril,<sup>c</sup> C. Y. Chung,<sup>b</sup> and Andrey L. Rogach<sup>a\*</sup>

<sup>a</sup> Department of Physics and Materials Science & Centre for Functional Photonics (CFP), City University of Hong Kong, Hong Kong SAR. E-mail: andrey.rogach@cityu.edu.hk

<sup>b</sup> Department of Physics and Materials Science, City University of Hong Kong, Hong Kong SAR

<sup>c</sup> Regional Centre of Advanced Technologies and Materials, Faculty of Science, Department of Physical Chemistry, Palacky University in Olomouc, Olomouc, Czech Republic

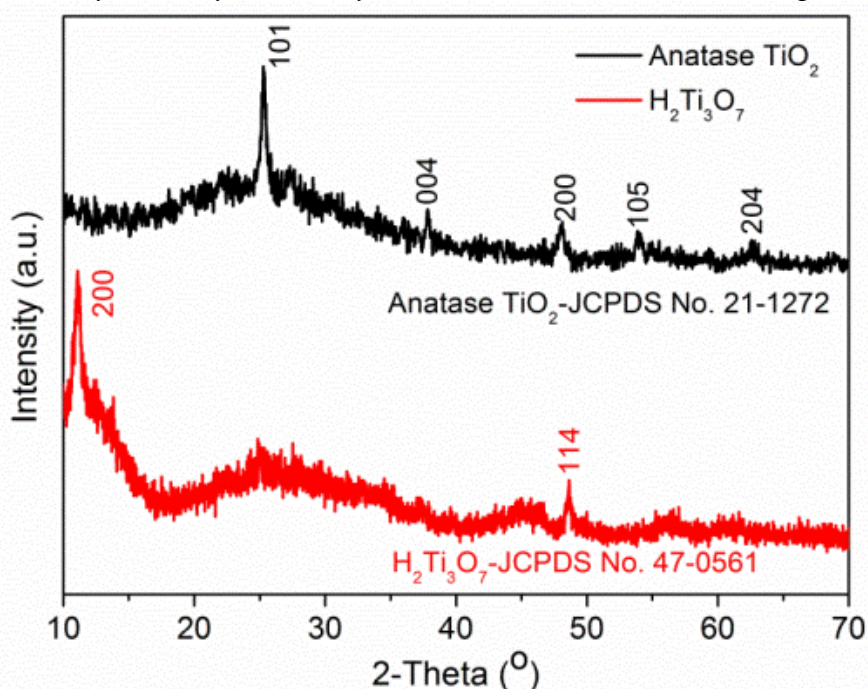

**Figure S1.** XRD patterns of titanate nanowires (red) which transform into anatase TiO<sub>2</sub> (black) after hydrothermal treatment at 180 °C for 24h if no SnCl<sub>2</sub> and NaF are present in the reaction mixture. The XRD pattern reveals that the titanate nanowires can be indexed to the trititanate phase in the monoclinic C2/m space group using the H<sub>2</sub>Ti<sub>3</sub>O<sub>7</sub> unit cell parameters. The trititanate phase has unit layers composed of three edge-shared TiO<sub>6</sub> octahedra, in which each unit of three TiO<sub>6</sub> octahedra is weakly linked through corner sharing.<sup>[1]</sup>

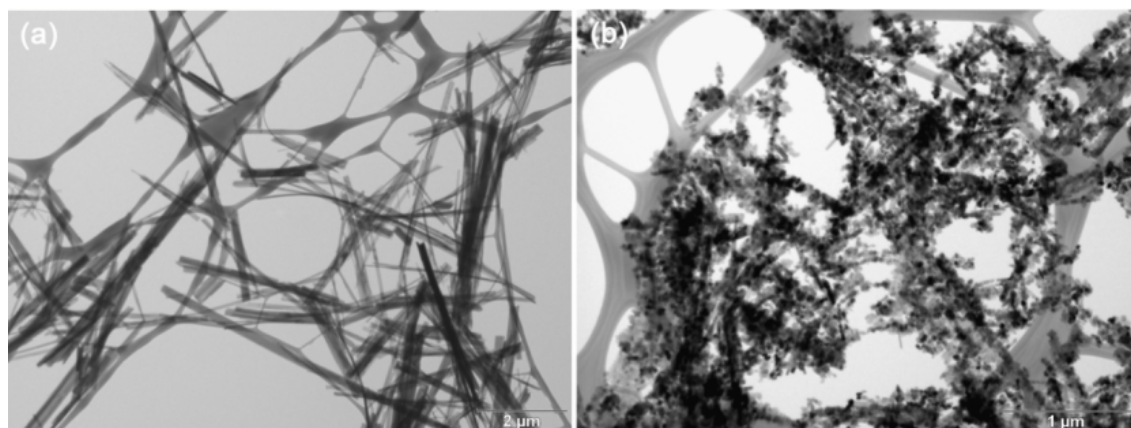

**Figure S2.** TEM images of (a) titanate nanowires which transform into (b) anatase TiO<sub>2</sub> after hydrothermal treatment at 180 °C for 24h if no SnCl<sub>2</sub> and NaF are present in the reaction mixture.

**Table S1.** d-spacings determined from the XRD patterns of Ti-doped SnO<sub>2</sub>, compared to those of tetragonal SnO<sub>2</sub> (cassiterite, JCPDS#41-1445). The lattice parameters of Ti-doped SnO<sub>2</sub> are  $a = b = 4.7120 \text{ \AA}$ ,  $c = 3.1458 \text{ \AA}$  and the volume of the unit cell  $V = 69.822 \text{ \AA}^3$ , which is decreased by 2.4% as compared to SnO<sub>2</sub>.

| ( $\text{\AA}$ )           | Ti-doped SnO <sub>2</sub> | JCPDS#41-1445 |
|----------------------------|---------------------------|---------------|
| d <sub>110</sub>           | <b>3.31705</b>            | 3.3470        |
| d <sub>101</sub>           | <b>2.61830</b>            | 2.6427        |
| d <sub>200</sub>           | <b>2.35723</b>            | 2.3690        |
| d <sub>211</sub>           | <b>1.74911</b>            | 1.7641        |
| d <sub>220</sub>           | <b>1.66543</b>            | 1.6750        |
| d <sub>221</sub>           | <b>1.49292</b>            | 1.4829        |
| d <sub>301</sub>           | <b>1.40713</b>            | 1.4155        |
| a=b                        | <b>4.7120</b>             | 4.738         |
| c                          | <b>3.1458</b>             | 3.187         |
| V=a*b*c ( $\text{\AA}^3$ ) | <b>69.844</b>             | 71.544        |

**Table S2.** XPS analysis of Sn(II)-doped and Ti(IV)/Sn(II) co-doped SnO<sub>2</sub>.

|       | Binding energy (eV) |       | Atomic concentration (%) |       |
|-------|---------------------|-------|--------------------------|-------|
|       | Undoped             | Doped | Undoped                  | Doped |
| Sn 3d | 487.4               | 487.2 | 27.90                    | 25.42 |
| O 1s  | 531.3               | 531.0 | 52.45                    | 57.09 |
| F 1s  | 685.3               | 684.8 | 3.80                     | 3.20  |
| Ti 2p | ---                 | 459.5 | ---                      | 4.65  |
| C 1s  | 285.1               | 285.0 | 15.85                    | 9.63  |

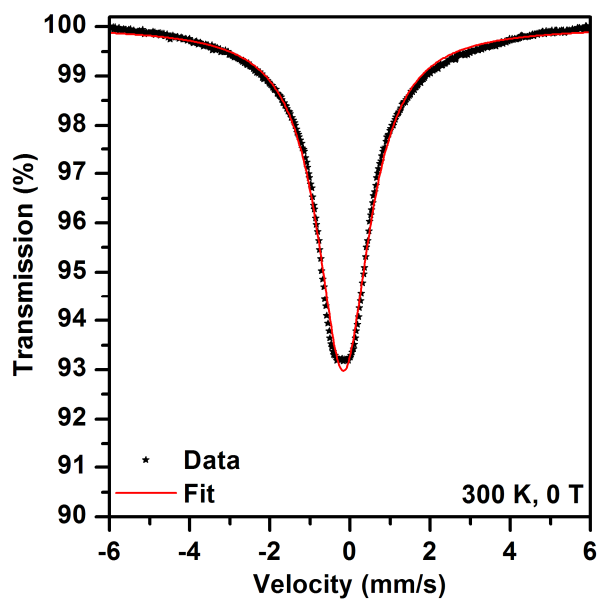

**Figure S3.** Room-temperature Mössbauer spectrum of Ti(IV)/Sn(II) co-doped SnO<sub>2</sub> after calcination at 500 °C in air for 2h. The hyperfine parameters correspond to Sn(IV) component.

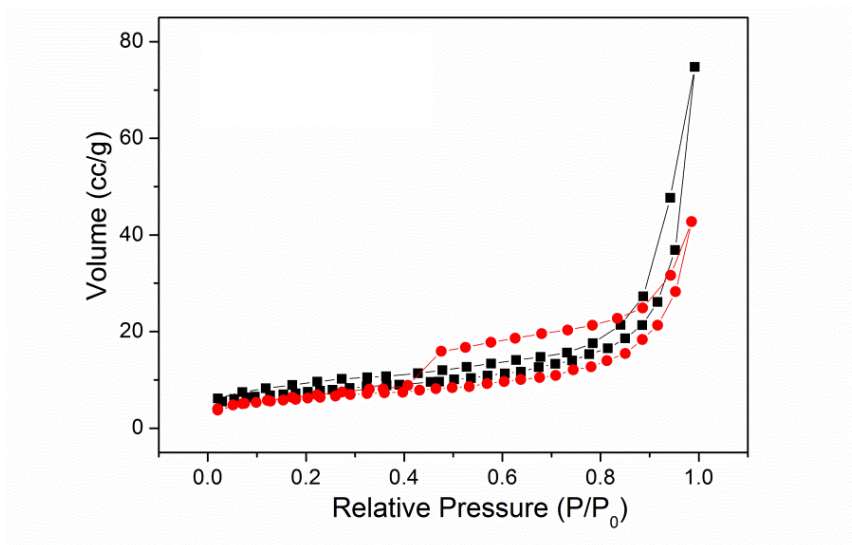

**Figure S4.** Nitrogen adsorption and desorption isotherms of hierarchical Sn(II)-doped SnO<sub>2</sub> nanoflowers (red line and points) and Ti(IV)/Sn(II) co-doped SnO<sub>2</sub> nanowires (black line and points).

#### Reference

- [1] H. K. Wang, W. Shao, F. Gu, L. Zhang, M. K. Lu, C. Z. Li, *Inorg. Chem.* **2009**, 48, 9732.
